# Supplementary figures and images for: Nuclear mitotic apparatus protein, NuMA, modulates p53-mediated transcription in cancer cells
Source: PubMed Central journal article supplement — Cell Death Dis. 2013 Jul 4;4(7):e713–. doi: 10.1038/cddis.2013.239 (PMC3730413; doi:10.1038/cddis.2013.239), 2013-07-04

**a**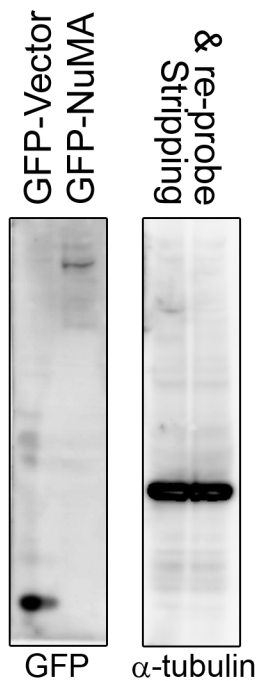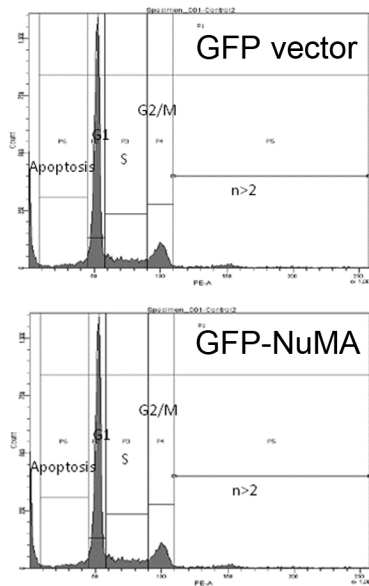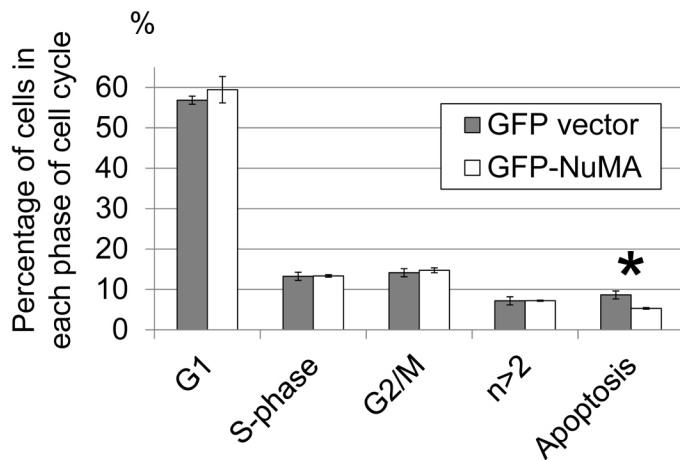**b**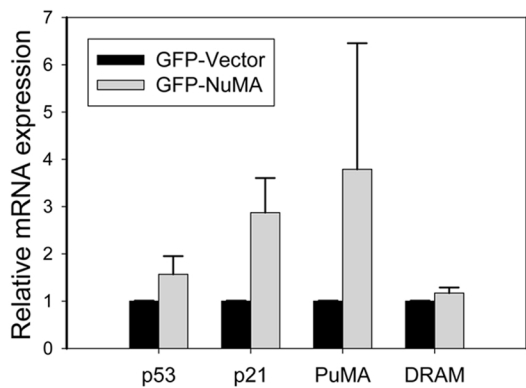**c**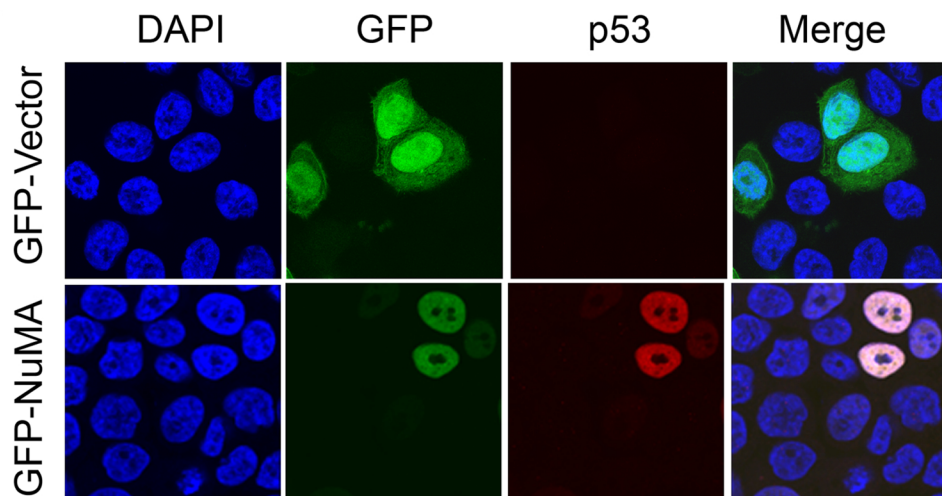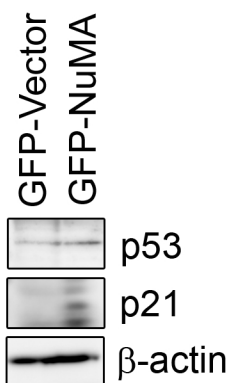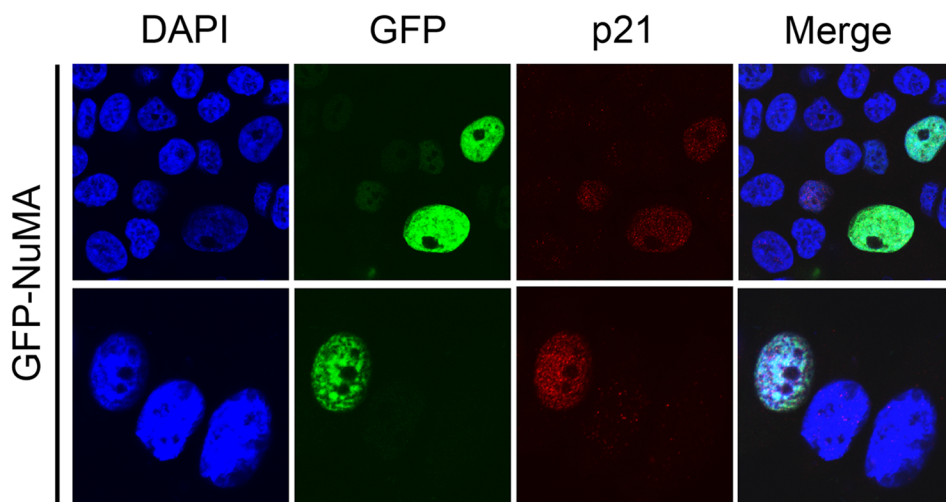

Supplement: cddis2013239x1.pdf [file cddis2013239x1.pdf]
